# Supplementary material
Source: PubMed Central journal article supplement (PMC4564295)
Supplement: NIHMS694454-supplement.pdf [file NIHMS694454-supplement.pdf]

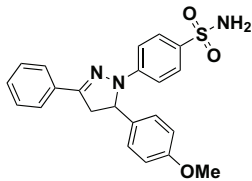

**ML141** ■  
Cdc42 inhibitor  
(*Surviladze et al. 2010*)

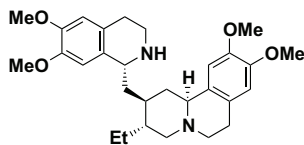

**ML081** ■  
RBBP9 inhibitor  
(*Bachovchin et al., 2009*)

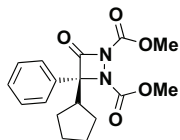

**ML174** ■  
PME-1 inhibitor  
(*Bachovchin et al., 2011*)

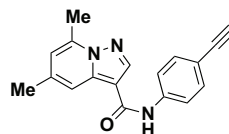

**ML198** ■  
Activator of GCCase  
(*Goldin et al., 2012; Rogers et al., 2010*)

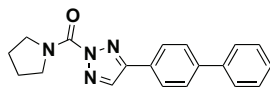

**ML225** ■  
PAFAH2 inhibitor  
(*Adibekian et al. 2010b*)

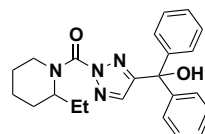

**ML226** ■  
ABHD11 inhibitor  
(*Adibekian et al. 2010a*)

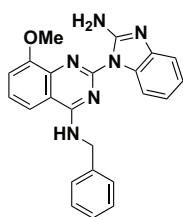

**ML240** ■  
p97 AAA ATPase inhibitor  
(*Chou et al. 2013*)

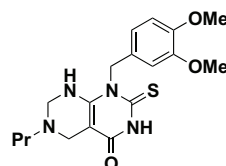

**ML247** ■  
Non-inhibitory chaperone of  
acid alpha glucosidase  
(*Marugan et al. 2010*)

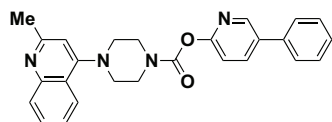

**ML256** ■  
pPAFAH inhibitor  
(*Nagano et al. 2010*)

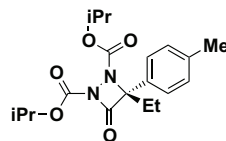

**ML257** ■  
ABHD10 inhibitor  
(*Zuhl et al. 2012*)

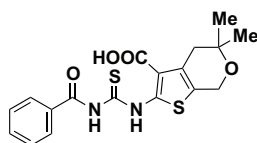

**ML282** ■  
Rab7 GTPase pan-inhibitor  
(*Hong et al. 2010*)

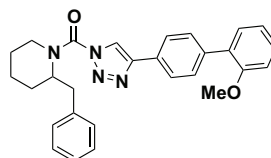

**ML294** ■  
DAGL-β inhibitor  
(*Hsu et al. 2010a*)

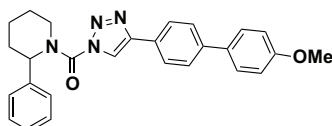

**ML295** ■  
Brain-penetrant ABHD6  
inhibitor  
(*Hsu et al. 2010b*)

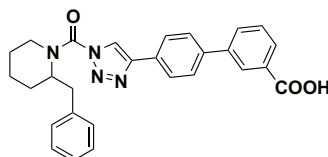

**ML296** ■  
Peripherally-restricted ABHD6  
inhibitor  
(*Hsu et al. 2010b*)

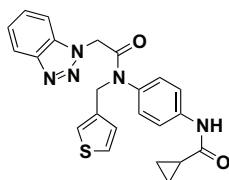

**ML300** ■  
3CLpro inhibitor  
(*Turlington et al. 2010*)

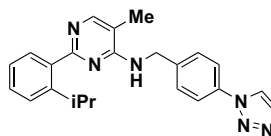

**ML323** ■  
USP1 inhibitor  
(*Liang et al. 2014*)

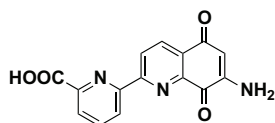

**ML325** ■  
Pan-PAD inhibitor  
(*Dreyton et al. 2014*)

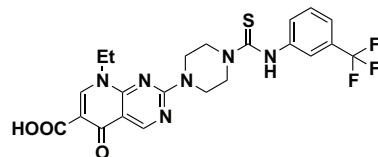

**ML328** ■  
Dual AddAB/RecBCD  
inhibitor (*Amundsen et al.  
2012*)

■ Enzyme modulator

■ Hydrolase

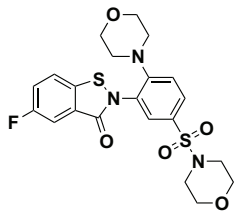

**ML345** ■  
IDE inhibitor  
(Bannister et al. 2010b)

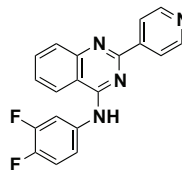

**ML367** ■  
Inhibitor of ATAD5 stabilization  
(Rohde et al. 2010)

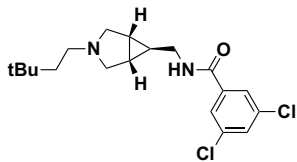

**ML218** ■  
Cav3 inhibitor  
(Xie et al. 2010)

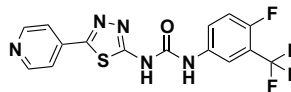

**ML216** ■  
Bloom helicase inhibitor  
(Nguyen et al. 2013, Rosenthal et al. 2013)

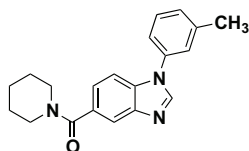

**ML148** ■  
15-HPGD inhibitor  
(Niesen et al. 2010)

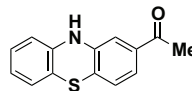

**ML171** ■  
NOX1 inhibitor  
(Gianni et al. 2010)

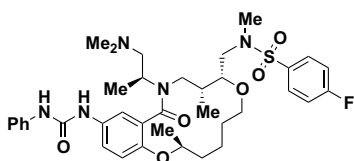

**ML238** ■  
Inhibitor of *P. falciparum* bc1 complex (Q1)  
(Heidebrecht et al., 2012; Weiwert et al., 2010)

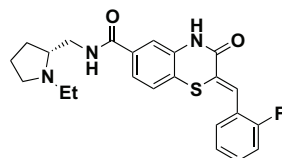

**ML276** ■  
Pf G6PD inhibitor  
(Preuss et al. 2012)

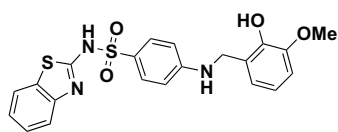

**ML355** ■  
12-LO inhibitor  
(Luci et al. 2014)

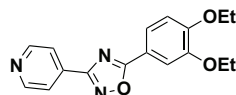

**ML007** ■  
S1PR1 agonist  
(Gonzalez-Cabrera et al., 2008)

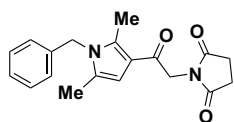

**ML031** ■  
S1PR2 agonist  
(Satsu et al., 2013)

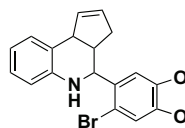

**ML050** ■  
GPR30 antagonist  
(Bologa et al. 2006, Dennis et al. 2009)

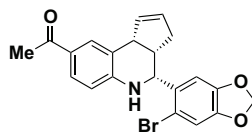

**ML051** ■  
GPR30 agonist  
(Bologa et al. 2006)

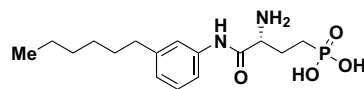

**ML056** ■  
S1PR1 antagonist  
(Sanna et al., 2006, PDB: 3v2y, 3v2w)

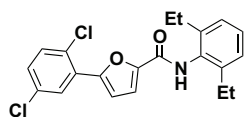

**ML131** ■  
S1PR4 antagonist  
(Guerrero et al., 2011; Oldstone et al., 2010; Urbano et al., 2011a; Urbano et al., 2011b)

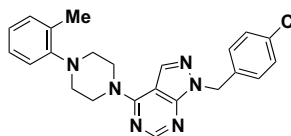

**ML144** ■  
GPR35 antagonist  
(Heynen-Genel et al. 2010b)

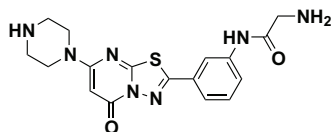

**ML165** ■  
Integrin  $\alpha_{IIb}\beta_3$  receptor antagonist that prevents  $Mg^{2+}$  binding  
(Jiang et al. 2014, Zhu et al. 2012, PDB: 3t3m)

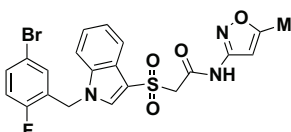

**ML169** ■  
M1 AChR positive allosteric modulator  
(Bridges et al., 2010; Reid et al., 2011; Tarr et al., 2012)

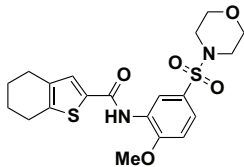

**ML186** ■  
GPR55 antagonist  
(Heynen-Genel et al. 2010a)

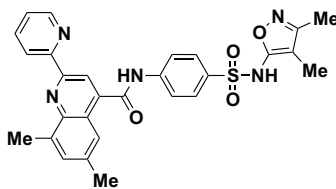

**ML193** ■  
GPR55 agonist  
(Kotsikorou et al. 2013)

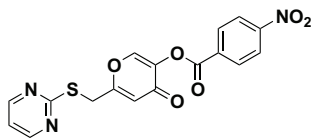

**ML221** ■  
Apelin J receptor antagonist  
(Maloney et al. 2012)

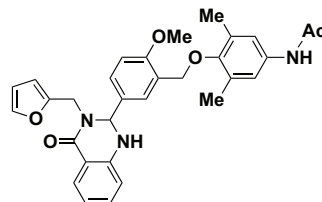

**ML224** ■  
TSHR inverse agonist  
(Neumann et al. 2014)

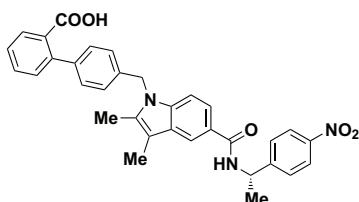

**ML244** ■  
Inhibitor of Cdk5- mediated  
PPAR $\gamma$  phosphorylation  
(Choi et al., 2011; Kamenecka et  
al., 2010)

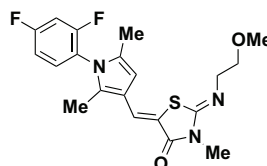

**ML248** ■  
S1PR4 agonist  
(Guerrero et al., 2010b; Guerrero  
et al., 2012)

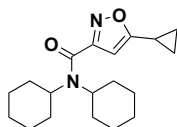

**ML249** ■  
S1PR3 agonist  
(Guerrero et al., 2010a; Jo et al.,  
2012; Urbano et al., 2013)

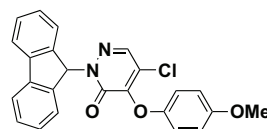

**ML250** ■  
GPR7 antagonist  
(Guerrero et al. 2013)

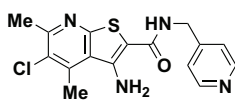

**ML253** ■  
M4 AChR positive allosteric  
modulator  
(Le et al., 2013; Niswender et al.,  
2010)

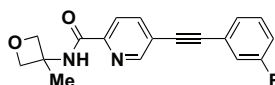

**ML254** ■  
mGluR5 positive allosteric  
modulator  
(Zhou et al. 2010)

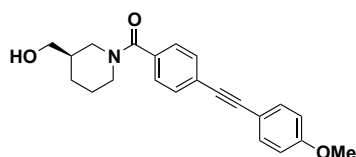

**ML289** ■  
mGluR3 negative allosteric  
modulator  
(Sheffler et al. 2010)

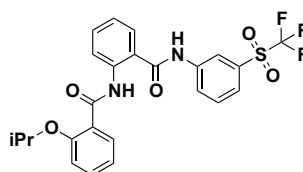

**ML290** ■  
RXFP1 agonist  
(Xiao et al. 2013)

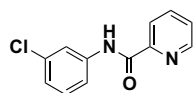

**ML292** ■  
mGluR4 positive allosteric  
modulator  
(Engers et al. 2010)

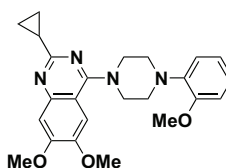

**ML314** ■  
NTR1  $\beta$ -arrestin biased agonist  
(Peddibhotla et al. 2013)

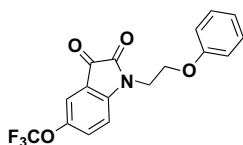

**ML326** ■  
M5 AChR positive allosteric  
modulator  
(Gentry et al., 2010; Gentry et  
al., 2013)

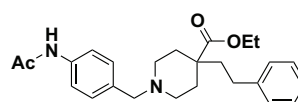

**ML335** ■  
Inhibitor of OPRM1-OPRD1  
heterodimerization  
(Gomes et al. 2013)

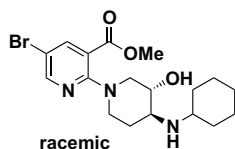

**ML350** ■  
OPRK antagonist  
(Guerrero et al. 2010)

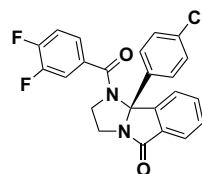

**ML375** ■  
M5 AChR negative  
allosteric modulator  
(Gentry et al. 2013)

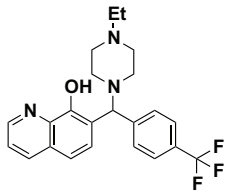

**ML311** ■  
MCL1-BIM inhibitor  
(Bannister et al. 2010a)

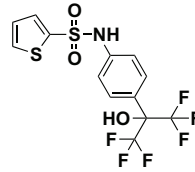

**ML176** ■  
RORα inverse agonist  
(Kumar et al. 2011)

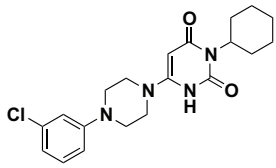

**ML180** ■  
LRH1 inverse agonist  
(Busby et al. 2010)

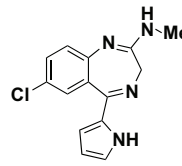

**ML223** ■  
CBFβ-RUNX1 inhibitor  
(Cunningham et al. 2012)

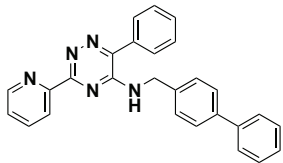

**ML228** ■  
HIF activator  
(Theriault et al. 2010)

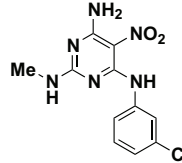

**ML231** ■  
RTG branch of yeast TORC1 inhibitor  
(Chen et al. 2010)

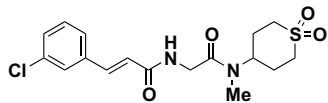

**ML264** ■  
KLF5 inhibitor  
(Bialkowska et al. 2010)

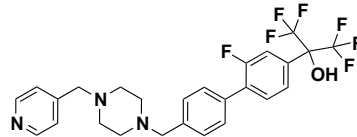

**ML310** ■  
RORγ inverse agonist  
(Busby et al. 2010)

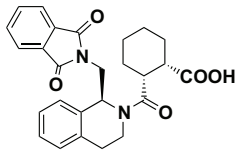

**ML334** ■  
Non-covalent Keap1-Nrf2 inhibitor  
(Amundsen et al. 2012, PDB: 417b)

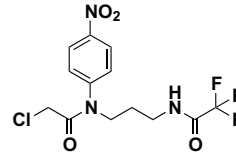

**ML175** ■  
GSTO1 inhibitor  
(Tsuboi et al. 2011)

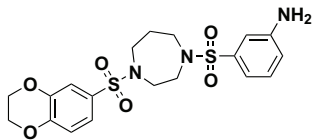

**ML203** ■  
PKM2 activator  
(Boxer et al., 2010, PDB: 3me3)

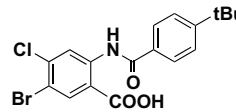

**ML205** ■  
T. brucei HK1 inhibitor  
(Sharlow et al. 2010)

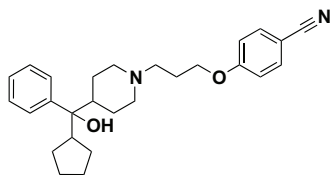

**ML227** ■  
Menin-MLL inhibitor  
(Manka et al. 2010)

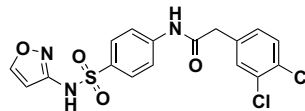

**ML251** ■  
T. brucei phospho-fructokinase inhibitor  
(Walsh et al. 2010)

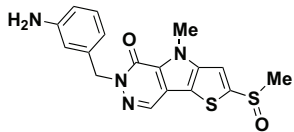

**ML265** ■  
PKM2 activator  
(Boxer et al., 2010, PDB: 3u2z)

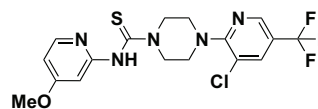

**ML267** ■  
Sfp-PPTase inhibitor  
(Foley et al. 2014)

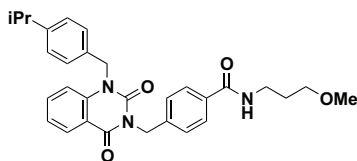

**ML275** ■  
RSV polymerase inhibitor  
(Noah et al. 2010)

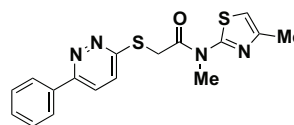

**ML077** ■  
KCC2 antagonist  
(Lindsley et al. 2010)

■ Signalling molecule   ■ Transcription factor   ■ Transferase   ■ Transporter

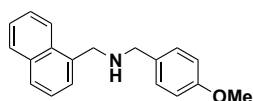

**ML133** ■  
KCNJ2 inhibitor  
(Wang et al. 2011)

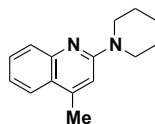

**ML204** ■  
TRPC4 inhibitor  
(Miller et al. 2011)

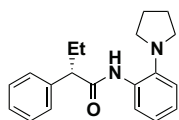

**ML252** ■  
KCNQ2 inhibitor  
(Cheung et al. 2012)

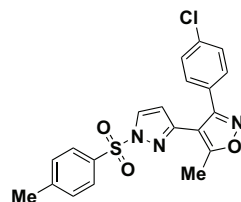

**ML269** ■  
TRPML3 agonist  
(Grimm et al. 2010)

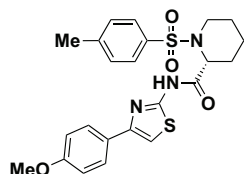

**ML277** ■  
KCNQ1 activator  
(Mattmann et al. 2012, Yu et al. 2013)

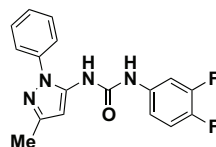

**ML297** ■  
GIRK activator  
(Days et al. 2010)

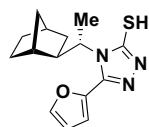

**ML308** ■  
KCNK9 inhibitor  
(Miller et al. 2010)

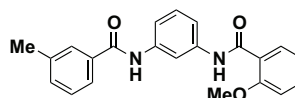

**ML365** ■  
KCNK3 inhibitor  
(Zou et al. 2010)

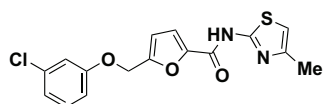

**ML245**  
Breast cancer stem cell  
inhibitor  
(Carmody et al. 2010)

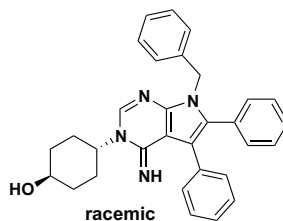

**ML246**  
Inhibitor of PNC prevalence  
(Norton et al. 2009)

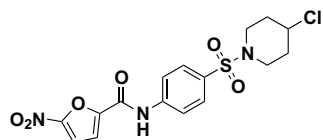

**ML291**  
CHOP pathway agonist that  
activates the UPR  
(Flaherty et al. 2010)

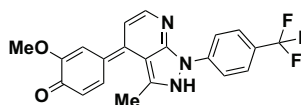

**ML303**  
Influenza virus NS1 antagonist  
(Patnaik et al. 2010)

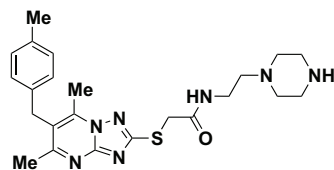

**ML322**  
Inhibitor of HCV core  
dimerization  
(Kota et al. 2010)

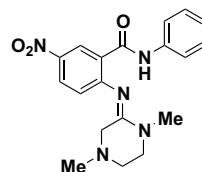

**ML336**  
Inhibitor of VEEV  
replication protein  
(Chung et al. 2010)

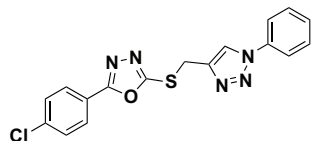

**ML338**  
Non-replicating Mtb inhibitor  
(Nag et al. 2010)

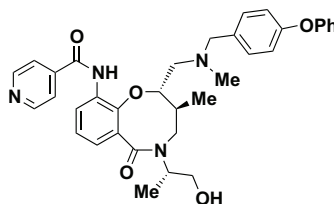

**ML341**  
T. cruzi antimicrobial  
(Carmody et al., 2010; Danda-  
pani et al., 2014)

**Supplementary Table 1. Noteworthy MLP probes.** The MLP Network identified numerous small-molecule probes, a subset of which are highlighted here, that act against a target for which a reasonably selective small-molecule was previously unavailable or that modulate a target via a novel mechanism of action. In analogy to language often used in the pharmaceutical industry to describe the initial member of a new drug class, these small molecules can be considered ‘first-in-class’ probes. Some of these initial probes may lack optimal potency or selectivity or may contain reactive functional groups that would ideally be excluded from probe compounds. However even when these limitations apply, these probes are a particularly critical advance because each provides a new tool for investigating emerging biology and alters the perception of what is ‘druggable’.

## REFERENCES

- Adibekian, A., Hsu, K.L., Speers, A.E., Brown, S.J., Spicer, T., Fernandez-Vega, V., Ferguson, J., Cravatt, B.F., Hodder, P., and Rosen, H. (2010a). Optimization and characterization of a triazole urea inhibitor for alpha/beta hydrolase domain-containing protein 11 (ABHD11): anti-probe for LYPLA1/LYPLA2 dual inhibitor ML211. In Probe Reports from the NIH Molecular Libraries Program (Bethesda (MD)).
- Adibekian, A., Hsu, K.L., Speers, A.E., Monillas, E.S., Brown, S.J., Spicer, T., Fernandez-Vega, V., Ferguson, J., Bahnson, B.J., Cravatt, B.F., Hodder, P., and Rosen, H. (2010b). Optimization and characterization of a triazole urea inhibitor for platelet-activating factor acetylhydrolase type 2 (PAFAH2). In Probe Reports from the NIH Molecular Libraries Program (Bethesda (MD)).
- Amundsen, S.K., Spicer, T., Karabulut, A.C., Londono, L.M., Eberhart, C., Fernandez Vega, V., Bannister, T.D., Hodder, P., and Smith, G.R. Small-molecule inhibitors of bacterial AddAB and RecBCD helicase-nuclease DNA repair enzymes. *ACS Chem Biol* 7, 879-891 (2012).
- Bachovchin, D.A., Brown, S.J., Rosen, H., and Cravatt, B.F. Identification of selective inhibitors of uncharacterized enzymes by high-throughput screening with fluorescent activity-based probes. *Nat Biotechnol* 27, 387-394 (2009).
- Bachovchin, D.A., Mohr, J.T., Speers, A.E., Wang, C., Berlin, J.M., Spicer, T.P., Fernandez-Vega, V., Chase, P., Hodder, P.S., Schurer, S.C., Nomura, D.K., Rosen, H., Fu, G.C., and Cravatt, B.F. Academic cross-fertilization by public screening yields a remarkable class of protein phosphatase methylesterase-1 inhibitors. *Proc Natl Acad Sci USA* 108, 6811-6816 (2011).
- Bannister, T., Koenig, M., He, Y., Mishra, J., Spicer, T., Minond, D., Saldanha, A., Mercer, B.A., Cameron, M., Lena, R., Carlson, N., Richard, D., Cardone, M., and Hodder, P. (2010a). ML311: A Small Molecule that Potently and Selectively Disrupts the Protein-Protein Interaction of Mcl-1 and Bim: A Probe for Studying Lymphoid Tumorigenesis. In Probe Reports from the NIH Molecular Libraries Program (Bethesda (MD)).
- Bannister, T.D., Wang, H., Abdul-Hay, S.O., Masson, A., Madoux, F., Ferguson, J., Mercer, B.A., Schurer, S., Zuhl, A., Cravatt, B.F., Leissring, M.A., and Hodder, P.

(2010b). ML345: A Small-Molecule Inhibitor of the Insulin-Degrading Enzyme (IDE). In Probe Reports from the NIH Molecular Libraries Program (Bethesda (MD)).

Bialkowska, A., Crisp, M., Madoux, F., Spicer, T., Knapinska, A., Mercer, B., Bannister, T.D., He, Y., Chowdhury, S., Cameron, M., Yang, V.W., and Hodder, P. (2010). ML264: An Antitumor Agent that Potently and Selectively Inhibits Kruppel-like Factor Five (KLF5) Expression: A Probe for Studying Colon Cancer Development and Progression. In Probe Reports from the NIH Molecular Libraries Program (Bethesda (MD)).

Bologa, C.G., Revankar, C.M., Young, S.M., Edwards, B.S., Arterburn, J.B., Kiselyov, A.S., Parker, M.A., Tkachenko, S.E., Savchuck, N.P., Sklar, L.A., Oprea, T.I., and Prossnitz, E.R. Virtual and biomolecular screening converge on a selective agonist for GPR30. *Nat Chem Biol* 2, 207-212 (2006).

Boxer, M.B., Jiang, J.K., Vander Heiden, M.G., Shen, M., Skoumbourdis, A.P., Southall, N., Veith, H., Leister, W., Austin, C.P., Park, H.W., Inglese, J., Cantley, L.C., Auld, D.S., and Thomas, C.J. Evaluation of substituted N,N'-diarylsulfonamides as activators of the tumor cell specific M2 isoform of pyruvate kinase. *J Med Chem* 53, 1048-1055 (2010).

Bridges, T.M., Reid, P.R., Lewis, L.M., Dawson, E.S., Weaver, C.D., Wood, M.R., and Lindsley, C.W. (2010). Discovery and development of a second highly selective M1 Positive Allosteric Modulator (PAM). In Probe Reports from the NIH Molecular Libraries Program (Bethesda (MD)).

Busby, S., Nuhant, P., Cameron, M., Mercer, B.A., Hodder, P., Roush, W.R., and Griffin, P.R. (2010). Discovery of Inverse Agonists for the Liver Receptor Homologue-1 (LRH1; NR5A2). In Probe Reports from the NIH Molecular Libraries Program (Bethesda (MD)).

Carmody, L.C., Germain, A., Morgan, B., VerPlank, L., Fernandez, C., Feng, Y., Perez, J.R., Dandapani, S., Munoz, B., Palmer, M., Lander, E.S., Gupta, P.B., and Schreiber, S.L. (2010a). Identification of a Selective Small-Molecule Inhibitor of Breast Cancer Stem Cells - Probe 2. In Probe Reports from the NIH Molecular Libraries Program (Bethesda (MD)).

Carmody, L.C., Germain, A.R., Engel, J.C., Gut, J., Kaiser, M., Jewett, I., LeQuemen, S., Marie, J.C., Dandapani, S., Rodriguez, A., Perez, J.R., McKerrow, J.H., Palmer, M.A.J., Munoz, B., and Schreiber, S.L. (2010b). Identification of Diversity-Oriented Synthesis Derived Small Molecule, ML341, with Cidal Activity Against *Trypanosoma cruzi*. In Probe Reports from the NIH Molecular Libraries Program (Bethesda (MD)).

Chen, J., Young, S.M., Allen, C., Waller, A., Ursu, O., Strouse, J.J., Yao, T., Golden, J.E., Peterson, B.R., Foutz, T.D., Chavez, S.E., Perez, D., Evangelisti, A.M., Garcia, M.J., Bologa, C.G., Carter, M.B., Salas, V.M., Oprea, T.I., Edwards, B.S., Panchaud, N., De Virgilio, C., Seeber, A., Loewith, R., Manzanilla, E., Werner-Washburne, M., Aube, J., and Sklar, L.A. (2010). Profiling a Selective Probe for RTG Branch of Yeast TORC1 Signaling Pathway. In Probe Reports from the NIH Molecular Libraries Program (Bethesda (MD)).

Cheung, Y.Y., Yu, H., Xu, K., Zou, B., Wu, M., McManus, O.B., Li, M., Lindsley, C.W., and Hopkins, C.R. Discovery of a series of 2-phenyl-N-(2-(pyrrolidin-1-yl)phenyl)acetamides as novel molecular switches that modulate modes of K(v)7.2

(KCNQ2) channel pharmacology: identification of (S)-2-phenyl-N-(2-(pyrrolidin-1-yl)phenyl)butanamide (ML252) as a potent, brain penetrant K(v)7.2 channel inhibitor. *J Med Chem* 55, 6975-6979 (2012).

Choi, J.H., Banks, A.S., Kamenecka, T.M., Busby, S.A., Chalmers, M.J., Kumar, N., Kuruvilla, D.S., Shin, Y., He, Y., Bruning, J.B., Marciano, D.P., Cameron, M.D., Laznik, D., Jurczak, M.J., Schurer, S.C., Vidovic, D., Shulman, G.I., Spiegelman, B.M., and Griffin, P.R. Antidiabetic actions of a non-agonist PPARgamma ligand blocking Cdk5-mediated phosphorylation. *Nature* 477, 477-481 (2011).

Chou, T.F., Li, K., Frankowski, K.J., Schoenen, F.J., and Deshaies, R.J. Structure-activity relationship study reveals ML240 and ML241 as potent and selective inhibitors of p97 ATPase. *ChemMedChem* 8, 297-312 (2013).

Chung, D., Schroeder, C.E., Sotsky, J., Yao, T., Roy, S., Smith, R.A., Tower, N.A., Noah, J.W., McKellip, S., Sosa, M., Rasmussen, L., White, E.L., Aube, J., and Golden, J.E. (2010). ML336: Development of Quinazolinone-Based Inhibitors Against Venezuelan Equine Encephalitis Virus (VEEV). In Probe Reports from the NIH Molecular Libraries Program (Bethesda (MD)).

Cunningham, L., Finckbeiner, S., Hyde, R.K., Southall, N., Marugan, J., Yedavalli, V.R., Dehdashti, S.J., Reinhold, W.C., Alemu, L., Zhao, L., Yeh, J.R., Sood, R., Pommier, Y., Austin, C.P., Jeang, K.T., Zheng, W., and Liu, P. Identification of benzodiazepine Ro5-3335 as an inhibitor of CBF leukemia through quantitative high throughput screen against RUNX1-CBFbeta interaction. *Proc Natl Acad Sci U S A* 109, 14592-14597 (2012).

Dandapani, S., Germain, A.R., Jewett, I., le Qument, S., Marie, J.C., Muncipinto, G., Duvall, J.R., Carmody, L.C., Perez, J.R., Engel, J.C., Gut, J., Kellar, D., Siqueira-Neto, J.L., McKerrow, J.H., Kaiser, M., Rodriguez, A., Palmer, M.A., Foley, M., Schreiber, S.L., and Munoz, B. Diversity-Oriented Synthesis Yields a New Drug Lead for Treatment of Chagas Disease. *ACS Med Chem Lett* 5, 149-153 (2014).

Days, E., Kaufmann, K., Romaine, I., Niswender, C., Lewis, M., Utley, T., Du, Y., Sliwoski, G., Morrison, R., Dawson, E.S., Engers, J.L., Denton, J., Daniels, J.S., Sulikowski, G.A., Lindsley, C.W., and Weaver, C.D. (2010). Discovery and Characterization of a Selective Activator of the G-Protein Activated Inward-Rectifying Potassium (GIRK) Channel. In Probe Reports from the NIH Molecular Libraries Program (Bethesda (MD)).

Dennis, M.K., Burai, R., Ramesh, C., Petrie, W.K., Alcon, S.N., Nayak, T.K., Bologna, C.G., Leitao, A., Brailoiu, E., Deliu, E., Dun, N.J., Sklar, L.A., Hathaway, H.J., Arterburn, J.B., Oprea, T.I., and Prossnitz, E.R. In vivo effects of a GPR30 antagonist. *Nat Chem Biol* 5, 421-427 (2009).

Dreyton, C.J., Anderson, E.D., Subramanian, V., Boger, D.L., and Thompson, P.R. Insights into the mechanism of streptonigrin-induced protein arginine deiminase inactivation. *Bioorg Med Chem* 22, 1362-1369 (2014).

Engers, D.W., Jones, C.K., Bubser, M., Thompson, A.D., Blobaum, A.L., Sheffler, D.J., Zamorano, R., Carrington, S.J.S., Bridges, T.M., Morrison, R.D., Daniels, J.S., Conn,



P.J., Lindsley, C.W., Niswender, C.M., and Hopkins, C.R. (2010). Discovery of a novel metabotropic glutamate receptor 4 (mGlu4) positive allosteric modulator (PAM) extended probe: Characterization of ML292, a potent and selective mGlu4 PAM which produces efficacy alone or in combination with L-DOPA in preclinical rodent models of Parkinson's disease. In Probe Reports from the NIH Molecular Libraries Program (Bethesda (MD)).

Flaherty, D.P., Golden, J.E., Liu, C., Hedrick, M., Gosalia, P., Li, Y., Milewski, M., Sugarman, E., Suyama, E., Nguyen, K., Vasile, S., Salaniwal, S., Stonich, D., Su, Y., Mangravita-Novo, A., Vicchiarelli, M., Smith, L.H., Diwan, J., Chung, T.D.Y., Pinkerton, A.B., Aube, J., Miller, J.R., Garshott, D.M., Callaghan, M.U., Fribley, A.M., and Kaufman, R.J. (2010). Selective small molecule activator of the apoptotic arm of the UPR. In Probe Reports from the NIH Molecular Libraries Program (Bethesda (MD)).

Foley, T.L., Rai, G., Yasgar, A., Daniel, T., Baker, H.L., Attene-Ramos, M., Kosa, N.M., Leister, W., Burkart, M.D., Jadhav, A., Simeonov, A., and Maloney, D.J. 4-(3-Chloro-5-(trifluoromethyl)pyridin-2-yl)-N-(4-methoxypyridin-2-yl)piperazine-1-carbothioamide (ML267), a potent inhibitor of bacterial phosphopantetheinyl transferase that attenuates secondary metabolism and thwarts bacterial growth. *J Med Chem* 57, 1063-1078 (2014).

Gentry, P.R., Bridges, T.M., Daniels, J.S., Lamsal, A., Vinson, P.N., Niswender, C.M., Hodder, P.S., Rosen, H., Conn, P.J., Engers, J., Lindsley, C.W., and Wood, M.R. (2010). Development and characterization of a highly selective M5 PAM probe molecule with improved potency. In Probe Reports from the NIH Molecular Libraries Program (Bethesda (MD)).

Gentry, P.R., Bridges, T.M., Lamsal, A., Vinson, P.N., Smith, E., Chase, P., Hodder, P.S., Engers, J.L., Niswender, C.M., Daniels, J.S., Jeffrey Conn, P., Wood, M.R., and Lindsley, C.W. Discovery of ML326: The first sub-micromolar, selective M5 PAM. *Bioorg Med Chem Lett* 23, 2996-3000 (2013a).

Gentry, P.R., Kokubo, M., Bridges, T.M., Kett, N.R., Harp, J.M., Cho, H.P., Smith, E., Chase, P., Hodder, P.S., Niswender, C.M., Daniels, J.S., Conn, P.J., Wood, M.R., and Lindsley, C.W. Discovery of the first M5-selective and CNS penetrant negative allosteric modulator (NAM) of a muscarinic acetylcholine receptor: (S)-9b-(4-chlorophenyl)-1-(3,4-difluorobenzoyl)-2,3-dihydro-1H-imidazo[2,1-a]isoindol-5(9bH)-one (ML375). *J Med Chem* 56, 9351-9355 (2013b).

Gianni, D., Taulet, N., Zhang, H., DerMardirossian, C., Kister, J., Martinez, L., Roush, W.R., Brown, S.J., Bokoch, G.M., and Rosen, H. A novel and specific NADPH oxidase-1 (Nox1) small-molecule inhibitor blocks the formation of functional invadopodia in human colon cancer cells. *ACS Chem Biol* 5, 981-993 (2010).

Goldin, E., Zheng, W., Motabar, O., Southall, N., Choi, J.H., Marugan, J., Austin, C.P., and Sidransky, E. High throughput screening for small molecule therapy for Gaucher disease using patient tissue as the source of mutant glucocerebrosidase. *PLoS One* 7, e29861 (2012).

Gomes, I., Fujita, W., Gupta, A., Saldanha, S.A., Negri, A., Pinello, C.E., Eberhart, C., Roberts, E., Filizola, M., Hodder, P., and Devi, L.A. Identification of a mu-delta opioid receptor heteromer-biased agonist with antinociceptive activity. *Proc Natl Acad Sci U S A* 110, 12072-12077 (2013).

Gonzalez-Cabrera, P.J., Jo, E., Sanna, M.G., Brown, S., Leaf, N., Marsolais, D., Schaeffer, M.T., Chapman, J., Cameron, M., Guerrero, M., Roberts, E., and Rosen, H. Full pharmacological efficacy of a novel S1P1 agonist that does not require S1P-like headgroup interactions. *Mol Pharmacol* 74, 1308-1318 (2008).

Grimm, C., Jors, S., Saldanha, S.A., Obukhov, A.G., Pan, B., Oshima, K., Cuajungco, M.P., Chase, P., Hodder, P., and Heller, S. Small molecule activators of TRPML3. *Chem Biol* 17, 135-148 (2010).

Guerrero, M., Poddutoori, R., Pinacho-Crisostomo, F., Schaeffer, M.T., Brown, S.J., Spicer, T., Chase, P., Ferguson, J., Roberts, E., Sanna, G., Hodder, P., and Rosen, H. (2010a). Probe Development Efforts for an Allosteric Agonist of the Sphingosine 1-phosphate Receptor 3 (S1P3). In Probe Reports from the NIH Molecular Libraries Program (Bethesda (MD)).

Guerrero, M., Urbano, M., Brown, S.J., Cayanan, C., Ferguson, J., Cameron, M., Devi, L.A., Roberts, E., and Rosen, H. (2010b). Optimization and characterization of an opioid kappa receptor (OPRK1) antagonist. In Probe Reports from the NIH Molecular Libraries Program (Bethesda (MD)).

Guerrero, M., Urbano, M., Schaeffer, M.T., Brown, S., Rosen, H., and Roberts, E. SAR analysis of novel non-peptidic NPBWR1 (GPR7) antagonists. *Bioorg Med Chem Lett* 23, 614-619 (2013).

Guerrero, M., Urbano, M., Velaparthy, S., Schaeffer, M.T., Brown, S.J., Crisp, M., Ferguson, J., Hodder, P., Rosen, H., Oldstone, M., and Roberts, E. (2010c). Identification of a Novel Agonist of the Sphingosine 1-phosphate Receptor 4 (S1P4). In Probe Reports from the NIH Molecular Libraries Program (Bethesda (MD)).

Guerrero, M., Urbano, M., Velaparthy, S., Zhao, J., Schaeffer, M.T., Brown, S., Rosen, H., and Roberts, E. Discovery, design and synthesis of the first reported potent and selective sphingosine-1-phosphate 4 (S1P4) receptor antagonists. *Bioorg Med Chem Lett* 21, 3632-3636 (2011).

Guerrero, M., Urbano, M., Zhao, J., Crisp, M., Chase, P., Hodder, P., Schaeffer, M.T., Brown, S., Rosen, H., and Roberts, E. Discovery, design and synthesis of novel potent and selective sphingosine-1-phosphate 4 receptor (S1P(4)-R) agonists. *Bioorg Med Chem Lett* 22, 537-542 (2012).

Heidebrecht, R.W., Jr., Mulrooney, C., Austin, C.P., Barker, R.H., Jr., Beaudoin, J.A., Cheng, K.C., Comer, E., Dandapani, S., Dick, J., Duvall, J.R., Ekland, E.H., Fidock, D.A., Fitzgerald, M.E., Foley, M., Guha, R., Hinkson, P., Kramer, M., Lukens, A.K., Masi, D., Marcaurelle, L.A., Su, X.Z., Thomas, C.J., Weiwer, M., Wiegand, R.C., Wirth, D., Xia, M., Yuan, J., Zhao, J., Palmer, M., Munoz, B., and Schreiber, S. Diversity-Oriented Synthesis Yields a Novel Lead for the Treatment of Malaria. *ACS Med Chem Lett* 3, 112-117 (2012).

Hershberger, P.M., Peddibhotla, S., Sessions, E.H., Divlianska, D.B., Correa, R.G., Pinkerton, A.B., Reed, J.C., and Roth, G.P. Synthesis and physicochemical characterization of novel phenotypic probes targeting the nuclear factor-kappa B signaling pathway. *Beilstein J Org Chem* 9, 900-907 (2013).

Heynen-Genel, S., Dahl, R., Shi, S., Milan, L., Hariharan, S., Bravo, Y., Sergienko, E., Hedrick, M., Dad, S., Stonich, D., Su, Y., Vicchiarelli, M., Mangravita-Novo, A., Smith, L.H., Chung, T.D.Y., Sharir, H., Barak, L.S., and Abood, M.E. (2010). Screening for Selective Ligands for GPR55 - Agonists. In Probe Reports from the NIH Molecular Libraries Program (Bethesda (MD)).

Hong, L., Simons, P., Waller, A., Strouse, J., Surviladze, Z., Ursu, O., Bologa, C., Gouveia, K., Agola, J.O., BasuRay, S., Wandinger-Ness, A., Sklar, L., Simpson, D.S., Schroeder, C.E., Golden, J.E., and Aube, J. (2010). A small molecule pan-inhibitor of Ras-superfamily GTPases with high efficacy towards Rab7. In Probe Reports from the NIH Molecular Libraries Program (Bethesda (MD)).

Hsu, K.L., Tsuboi, K., Speers, A.E., Brown, S.J., Spicer, T., Fernandez-Vega, V., Ferguson, J., Cravatt, B.F., Hodder, P., and Rosen, H. (2010a). Optimization and characterization of a triazole urea inhibitor for diacylglycerol lipase beta (DAGL-beta). In Probe Reports from the NIH Molecular Libraries Program (Bethesda (MD)).

Hsu, K.L., Tsuboi, K., Speers, A.E., Brown, S.J., Spicer, T., Fernandez-Vega, V., Ferguson, J., Cravatt, B.F., Hodder, P., and Rosen, H. (2010b). Optimization and characterization of triazole urea inhibitors for abhydrolase domain containing protein 6 (ABHD6). In Probe Reports from the NIH Molecular Libraries Program (Bethesda (MD)).

Jiang, J.K., McCoy, J.G., Shen, M., LeClair, C.A., Huang, W., Negri, A., Li, J., Blue, R., Harrington, A.W., Naini, S., David, G., 3rd, Choi, W.S., Volpi, E., Fernandez, J., Babayeva, M., Nedelman, M.A., Filizola, M., Coller, B.S., and Thomas, C.J. A novel class of ion displacement ligands as antagonists of the alpha11beta3 receptor that limit conformational reorganization of the receptor. *Bioorg Med Chem Lett* 24, 1148-1153 (2014).

Jo, E., Bhatarai, B., Repetto, E., Guerrero, M., Riley, S., Brown, S.J., Kohno, Y., Roberts, E., Schurer, S.C., and Rosen, H. Novel selective allosteric and bitopic ligands for the S1P(3) receptor. *ACS Chem Biol* 7, 1975-1983 (2012).

Kamenecka, T.M., Busby, S.A., Kumar, N., Choi, J.H., Banks, A.S., Vidovic, D., Cameron, M.D., Schurer, S.C., Mercer, B.A., Hodder, P., Spiegelman, B.M., and Griffin, P.R. (2010). Potent Anti-Diabetic Actions of a Novel Non-Agonist PPARgamma Ligand that Blocks Cdk5-Mediated Phosphorylation. In Probe Reports from the NIH Molecular Libraries Program (Bethesda (MD)).

Kota, S., Madoux, F., Chase, P., Takahashi, V., Liu, Q., Mercer, B.A., Cameron, M., Strosberg, A.D., Roush, W., and Hodder, P. (2010). ML322: A Small Molecule Inhibitor of Dimerization of the Core Protein of Hepatitis C Virus (HCV). In Probe Reports from the NIH Molecular Libraries Program (Bethesda (MD)).

Kotsikorou, E., Sharir, H., Shore, D.M., Hurst, D.P., Lynch, D.L., Madrigal, K.E., Heynen-Genel, S., Milan, L.B., Chung, T.D., Seltzman, H.H., Bai, Y., Caron, M.G., Barak, L.S., Croatt, M.P., Abood, M.E., and Reggio, P.H. Identification of the GPR55 antagonist binding site using a novel set of high-potency GPR55 selective ligands. *Biochemistry* 52, 9456-9469 (2013).

Kumar, N., Kojetin, D.J., Solt, L.A., Kumar, K.G., Nuhant, P., Duckett, D.R., Cameron, M.D., Butler, A.A., Roush, W.R., Griffin, P.R., and Burris, T.P. Identification of SR3335 (ML-176): a synthetic RORalpha selective inverse agonist. *ACS Chem Biol* 6, 218-222 (2011).

Le, U., Melancon, B.J., Bridges, T.M., Vinson, P.N., Utley, T.J., Lamsal, A., Rodriguez, A.L., Venable, D., Sheffler, D.J., Jones, C.K., Blobaum, A.L., Wood, M.R., Daniels, J.S., Conn, P.J., Niswender, C.M., Lindsley, C.W., and Hopkins, C.R. Discovery of a selective M(4) positive allosteric modulator based on the 3-amino-thieno[2,3-b]pyridine-2-carboxamide scaffold: development of ML253, a potent and brain penetrant compound that is active in a preclinical model of schizophrenia. *Bioorg Med Chem Lett* 23, 346-350 (2013).

Liang, Q., Dexheimer, T.S., Zhang, P., Rosenthal, A.S., Villamil, M.A., You, C., Zhang, Q., Chen, J., Ott, C.A., Sun, H., Luci, D.K., Yuan, B., Simeonov, A., Jadhav, A., Xiao, H., Wang, Y., Maloney, D.J., and Zhuang, Z. A selective USP1-UAF1 inhibitor links deubiquitination to DNA damage responses. *Nat Chem Biol* 10, 298-304 (2014).

Lindsley, C., Lewis, M., Weaver, D., and Delpire, E. (2010). Discovery of a Highly Selective KCC2 Antagonist. In Probe Reports from the NIH Molecular Libraries Program (Bethesda (MD)).

Luci, D.K., Jameson, J.B., 2nd, Yasgar, A., Diaz, G., Joshi, N., Kantz, A., Markham, K., Perry, S., Kuhn, N., Yeung, J., Kerns, E.H., Schultz, L., Holinstat, M., Nadler, J.L., Taylor-Fishwick, D.A., Jadhav, A., Simeonov, A., Holman, T.R., and Maloney, D.J. Synthesis and structure-activity relationship studies of 4-((2-hydroxy-3-methoxybenzyl)amino)benzenesulfonamide derivatives as potent and selective inhibitors of 12-lipoxygenase. *J Med Chem* 57, 495-506 (2014).

Maloney, P.R., Khan, P., Hedrick, M., Gosalia, P., Milewski, M., Li, L., Roth, G.P., Sergienko, E., Suyama, E., Sugarman, E., Nguyen, K., Mehta, A., Vasile, S., Su, Y., Stonich, D., Nguyen, H., Zeng, F.Y., Novo, A.M., Vicchiarelli, M., Diwan, J., Chung, T.D., Smith, L.H., and Pinkerton, A.B. Discovery of 4-oxo-6-((pyrimidin-2-ylthio)methyl)-4H-pyran-3-yl 4-nitrobenzoate (ML221) as a functional antagonist of the apelin (APJ) receptor. *Bioorg Med Chem Lett* 22, 6656-6660 (2012).

Manka, J., Daniels, R.N., Dawson, E., Daniels, J.S., Southall, N., Jadhav, A., Zheng, W., Austin, C., Grembecka, J., Cierpicki, T., Lindsley, C.W., and Stauffer, S.R. (2010). Inhibitors of the Menin-Mixed Lineage Leukemia (MLL) Interaction. In Probe Reports from the NIH Molecular Libraries Program (Bethesda (MD)).

Marugan, J.J., Zheng, W., Ferrer, M., Motabar, O., Southall, N., Goldin, E., Westbroek, W., and Sidransky, E. (2010). Discovery, SAR, and Biological Evaluation of a Non-Inhibitory Chaperone for Acid Alpha Glucosidase. In Probe Reports from the NIH Molecular Libraries Program (Bethesda (MD)).

Mattmann, M.E., Yu, H., Lin, Z., Xu, K., Huang, X., Long, S., Wu, M., McManus, O.B., Engers, D.W., Le, U.M., Li, M., Lindsley, C.W., and Hopkins, C.R. Identification of (R)-N-(4-(4-methoxyphenyl)thiazol-2-yl)-1-tosylpiperidine-2-carboxamide, ML277, as a novel, potent and selective K(v)7.1 (KCNQ1) potassium channel activator. *Bioorg Med Chem Lett* 22, 5936-5941 (2012).

Miller, M., Shi, J., Zhu, Y., Kustov, M., Tian, J.B., Stevens, A., Wu, M., Xu, J., Long, S., Yang, P., Zholos, A.V., Salovich, J.M., Weaver, C.D., Hopkins, C.R., Lindsley, C.W., McManus, O., Li, M., and Zhu, M.X. Identification of ML204, a novel potent antagonist that selectively modulates native TRPC4/C5 ion channels. *J Biol Chem* 286, 33436-33446 (2011).

Miller, M.R., Zou, B., Shi, J., Flaherty, D.P., Simpson, D.S., Yao, T., Maki, B.E., Day, V.W., Douglas, J.T., Wu, M., McManus, O.B., Golden, J.E., Aube, J., and Li, M. (2010). Development of a Selective Chemical Inhibitor for the Two-Pore Potassium Channel, KCNK9. In Probe Reports from the NIH Molecular Libraries Program (Bethesda (MD)).

Nag, P.P., Grant, S.S., Lewis, T.A., Gordon, K., Kawate, T., Iwase, N., White, E.L., Maddox, C., Nebane, N.M., Tower, N.A., McKellip, S., Sosa, M.I., Rasmussen, L., Mosher, C.M., Anthoine, T., Johnston, S., Dandapani, S., Perez, J., Munoz, B., Palmer, M., Schreiber, S.L., and Hung, D.T. (2010). Elucidation of the physiology of non-replicating, drug tolerant Mycobacterium tuberculosis with the aid of the small molecule probe ML338. In Probe Reports from the NIH Molecular Libraries Program (Bethesda (MD)).

Nagano, J.M.G., Hsu, K.L., Speers, A.E., Brown, S.J., Spicer, T., Fernandez-Vega, V., Ferguson, J., Bahnson, B.J., Cravatt, B.F., Hodder, P., and Rosen, H. (2010). Optimization and characterization of a carbamate inhibitor for plasma platelet-activating factor acetylhydrolase (pPAFAH). In Probe Reports from the NIH Molecular Libraries Program (Bethesda (MD)).

Neumann, S., Nir, E.A., Eliseeva, E., Huang, W., Marugan, J., Xiao, J., Dulcey, A.E., and Gershengorn, M.C. A selective TSH receptor antagonist inhibits stimulation of thyroid function in female mice. *Endocrinology* 155, 310-314 (2014).

Nguyen, G.H., Dexheimer, T.S., Rosenthal, A.S., Chu, W.K., Singh, D.K., Mosedale, G., Bachrati, C.Z., Schultz, L., Sakurai, M., Savitsky, P., Abu, M., McHugh, P.J., Bohr, V.A., Harris, C.C., Jadhav, A., Gileadi, O., Maloney, D.J., Simeonov, A., and Hickson, I.D. A small molecule inhibitor of the BLM helicase modulates chromosome stability in human cells. *Chem Biol* 20, 55-62 (2013).

Niesen, F.H., Schultz, L., Jadhav, A., Bhatia, C., Guo, K., Maloney, D.J., Pilka, E.S., Wang, M., Oppermann, U., Heightman, T.D., and Simeonov, A. High-affinity inhibitors of human NAD-dependent 15-hydroxyprostaglandin dehydrogenase: mechanisms of inhibition and structure-activity relationships. *PLoS One* 5, e13719 (2010).

Niswender, C.M., Rodriguez, A.L., Sheffler, D.J., Utley, T.J., Vinson, P.N., Dawson, E.S., Jones, C.K., Wood, M.R., Daniels, J.S., Conn, P.J., Engers, J.L., Le, U.M., Melancon, B.J., Hopkins, C.R., and Lindsley, C.W. (2010). Extended Probe Characterization: Development of an M4 PAM with Improved Activity and Brain Exposure, while Avoiding Species Bias. In Probe Reports from the NIH Molecular Libraries Program (Bethesda (MD)).

Noah, J.W., Severson, W.E., Chung, D.H., Moore, B., Jia, F., Xu, X., Maddox, C., Rasmussen, L., Sosa, M.I., Tower, N.A., Ananthan, S., Evans, C.W., White, E.L., Jonsson, C., Matharu, D.S., Flaherty, D.P., Simpson, D.S., Golden, J.E., and Aube, J. (2010). Identification of a Series of Quinazolinediones as Potent, Selective, Post-Entry

Inhibitors of Human Respiratory Syncytial Virus (hRSV) via a Cell-Based High Throughput Screen and Chemical Optimization. In Probe Reports from the NIH Molecular Libraries Program (Bethesda (MD)).

Norton, J.T., Titus, S.A., Dexter, D., Austin, C.P., Zheng, W., and Huang, S. Automated high-content screening for compounds that disassemble the perinucleolar compartment. *J Biomol Screen* 14, 1045-1053 (2009).

Oldstone, M., Hodder, P., Crisp, M., Roberts, E., Guerrero, M., Urbano, M., Velaparthy, S., Zhao, J., Rosen, H., Schaeffer, M.T., Brown, S., and Ferguson, J. (2010). Probe Development Efforts to Identify Novel Antagonists of the Sphingosine 1-phosphate Receptor 4 (S1P4). In Probe Reports from the NIH Molecular Libraries Program (Bethesda (MD)).

Patnaik, S., Basu, D., Dehdashti, S., Zheng, W., Ferrer, M., Southall, N., Taylor, M., Engel, D.A., and Marugan, J.J. (2010). Discovery of Small Molecule Influenza Virus NS1 Antagonist. In Probe Reports from the NIH Molecular Libraries Program (Bethesda (MD)).

Peddibhotla, S., Hedrick, M.P., Hershberger, P., Maloney, P.R., Li, Y., Milewski, M., Gosalia, P., Gray, W., Mehta, A., Sugarman, E., Hood, B., Suyama, E., Nguyen, K., Heynen-Genel, S., Vasile, S., Salaniwal, S., Stonich, D., Su, Y., Mangravita-Novo, A., Vicchiarelli, M., Roth, G.P., Smith, L.H., Chung, T.D., Hanson, G.R., Thomas, J.B., Caron, M.G., Barak, L.S., and Pinkerton, A.B. Discovery of ML314, a Brain Penetrant Non-Peptidic beta-Arrestin Biased Agonist of the Neurotensin NTR1 Receptor. *ACS Med Chem Lett* 4, 846-851 (2013).

Preuss, J., Maloney, P., Peddibhotla, S., Hedrick, M.P., Hershberger, P., Gosalia, P., Milewski, M., Li, Y.L., Sugarman, E., Hood, B., Suyama, E., Nguyen, K., Vasile, S., Sergienko, E., Mangravita-Novo, A., Vicchiarelli, M., McAnally, D., Smith, L.H., Roth, G.P., Diwan, J., Chung, T.D., Jortzik, E., Rahlfs, S., Becker, K., Pinkerton, A.B., and Bode, L. Discovery of a Plasmodium falciparum glucose-6-phosphate dehydrogenase 6-phosphogluconolactonase inhibitor (R,Z)-N-((1-ethylpyrrolidin-2-yl)methyl)-2-(2-fluorobenzylidene)-3-oxo-3,4-dihydro-2H-benzo[b][1,4]thiazine-6-carboxamide (ML276) that reduces parasite growth in vitro. *J Med Chem* 55, 7262-7272 (2012).

Reid, P.R., Bridges, T.M., Sheffler, D.J., Cho, H.P., Lewis, L.M., Days, E., Daniels, J.S., Jones, C.K., Niswender, C.M., Weaver, C.D., Conn, P.J., Lindsley, C.W., and Wood, M.R. Discovery and optimization of a novel, selective and brain penetrant M1 positive allosteric modulator (PAM): the development of ML169, an MLPCN probe. *Bioorg Med Chem Lett* 21, 2697-2701 (2011).

Rogers, S., Patnaik, S., Schoenen, F., Zheng, W., Choi, J., Motabar, O., Southall, N., Westbroek, W., Goldin, E., Sidransky, E., Leister, W., Marugan, J.J., and Aube, J. (2010). Discovery, SAR, and Biological Evaluation of Non-inhibitory Chaperones of Glucocerebrosidase. In Probe Reports from the NIH Molecular Libraries Program (Bethesda (MD)).

Rohde, J.M., Rai, G., Choi, Y.J., Sakamuru, S., Fox, J.T., Huang, R., Xia, M., Myung, K., Boxer, M.B., and Maloney, D.J. (2010). Discovery of ML367, inhibitor of ATAD5

stabilization. In Probe Reports from the NIH Molecular Libraries Program (Bethesda (MD)).

Rosenthal, A.S., Dexheimer, T.S., Gileadi, O., Nguyen, G.H., Chu, W.K., Hickson, I.D., Jadhav, A., Simeonov, A., and Maloney, D.J. Synthesis and SAR studies of 5-(pyridin-4-yl)-1,3,4-thiadiazol-2-amine derivatives as potent inhibitors of Bloom helicase. *Bioorg Med Chem Lett* 23, 5660-5666 (2013).

Sanna, M.G., Wang, S.K., Gonzalez-Cabrera, P.J., Don, A., Marsolais, D., Matheu, M.P., Wei, S.H., Parker, I., Jo, E., Cheng, W.C., Cahalan, M.D., Wong, C.H., and Rosen, H. Enhancement of capillary leakage and restoration of lymphocyte egress by a chiral S1P1 antagonist in vivo. *Nat Chem Biol* 2, 434-441 (2006).

Satsu, H., Schaeffer, M.T., Guerrero, M., Saldana, A., Eberhart, C., Hodder, P., Cayanan, C., Schurer, S., Bhatarai, B., Roberts, E., Rosen, H., and Brown, S.J. A sphingosine 1-phosphate receptor 2 selective allosteric agonist. *Bioorg Med Chem* 21, 5373-5382 (2013).

Sharlow, E., Golden, J.E., Dodson, H., Morris, M., Hesser, M., Lyda, T., Leimgruber, S., Schroeder, C.E., Flaherty, D.P., Weiner, W.S., Simpson, D., Lazo, J.S., Aube, J., and Morris, J.C. (2010). Identification of Inhibitors of Trypanosoma brucei Hexokinases. In Probe Reports from the NIH Molecular Libraries Program (Bethesda (MD)).

Sheffler, D.J., Wenthur, C.J., Brunner, J.A., Daniels, J.S., Morrison, R.D., Blobaum, A.L., Dawson, E.S., Engers, J.L., Niswender, C.M., Conn, P.J., and Lindsley, C.W. (2010). Development of the First Selective mGlu3 NAM from an mGlu5 PAM Hit. In Probe Reports from the NIH Molecular Libraries Program (Bethesda (MD)).

Surviladze, Z., Waller, A., Strouse, J.J., Bologna, C., Ursu, O., Salas, V., Parkinson, J.F., Phillips, G.K., Romero, E., Wandinger-Ness, A., Sklar, L.A., Schroeder, C., Simpson, D., Noth, J., Wang, J., Golden, J., and Aube, J. (2010). A Potent and Selective Inhibitor of Cdc42 GTPase. In Probe Reports from the NIH Molecular Libraries Program (Bethesda (MD)).

Tarr, J.C., Turlington, M.L., Reid, P.R., Utley, T.J., Sheffler, D.J., Cho, H.P., Klar, R., Pancani, T., Klein, M.T., Bridges, T.M., Morrison, R.D., Blobaum, A.L., Xiang, Z., Daniels, J.S., Niswender, C.M., Conn, P.J., Wood, M.R., and Lindsley, C.W. Targeting selective activation of M(1) for the treatment of Alzheimer's disease: further chemical optimization and pharmacological characterization of the M(1) positive allosteric modulator ML169. *ACS Chem Neurosci* 3, 884-895 (2012).

Therault, J.R., Perez, J., Gilbert, S., Palmer, M., Schreiber, S.L., Lindsley, C.W., Dawson, E.S., Engers, J.L., Felts, A.S., Bates, B.S., and Emmitte, K.A. (2010). Discovery of a Small Molecule Activator of the Hypoxia Inducible Factor Pathway. In Probe Reports from the NIH Molecular Libraries Program (Bethesda (MD)).

Tsuboi, K., Bachovchin, D.A., Speers, A.E., Spicer, T.P., Fernandez-Vega, V., Hodder, P., Rosen, H., and Cravatt, B.F. Potent and selective inhibitors of glutathione S-transferase omega 1 that impair cancer drug resistance. *J Am Chem Soc* 133, 16605-16616 (2011).

Turlington, M., Chun, A., Jacobs, J., Dawson, E., Daniels, J.S., Saldanha, A., Chase, P., Hodder, P., Egger, A., Tokars, V., Mesecar, A., Lindsley, C.W., and Stauffer, S.R. (2010). Non-covalent triazole-based inhibitors of the SARS main proteinase 3CLpro. In Probe Reports from the NIH Molecular Libraries Program (Bethesda (MD)).

Urbano, M., Guerrero, M., Rosen, H., and Roberts, E. Modulators of the Sphingosine 1-phosphate receptor 1. *Bioorg Med Chem Lett* 23, 6377-6389 (2013).

Urbano, M., Guerrero, M., Velaparthi, S., Crisp, M., Chase, P., Hodder, P., Schaeffer, M.T., Brown, S., Rosen, H., and Roberts, E. Discovery, synthesis and SAR analysis of novel selective small molecule S1P4-R agonists based on a (2Z,5Z)-5-((pyrrol-3-yl)methylene)-3-alkyl-2-(alkylimino)thiazolidin-4-one chemotype. *Bioorg Med Chem Lett* 21, 6739-6745 (2011a).

Urbano, M., Guerrero, M., Zhao, J., Velaparthi, S., Schaeffer, M.T., Brown, S., Rosen, H., and Roberts, E. SAR analysis of innovative selective small molecule antagonists of sphingosine-1-phosphate 4 (S1P(4)) receptor. *Bioorg Med Chem Lett* 21, 5470-5474 (2011b).

Walsh, M.J., Brimacombe, K.R., Vasquez-Valdivieso, M.G., Auld, D.S., Simeonov, A., Morgan, H.P., Fothergill-Gilmore, L.A., Michels, P.A.M., Walkinshaw, M.D., Shen, M., and Boxer, M.B. (2010). Identification of Selective Inhibitors of Phosphofructokinase as Lead Compounds Against Trypanosomiasis. In Probe Reports from the NIH Molecular Libraries Program (Bethesda (MD)).

Wang, H.R., Wu, M., Yu, H., Long, S., Stevens, A., Engers, D.W., Sackin, H., Daniels, J.S., Dawson, E.S., Hopkins, C.R., Lindsley, C.W., Li, M., and McManus, O.B. Selective inhibition of the K(ir)2 family of inward rectifier potassium channels by a small molecule probe: the discovery, SAR, and pharmacological characterization of ML133. *ACS Chem Biol* 6, 845-856 (2011).

Weiwer, M., Mulrooney, C., Massi, D., Heidebrecht, R., Wiegand, R., Lukens, A.K., Dick, J., Wirth, D., Eklund, E., Cheng, C.C., Zhao, J., Yuan, J., Su, X.Z., Johnson, R.L., Guha, R., Dandapani, S., Munoz, B., Palmer, M., Thomas, C., Austin, C.P., Fidock, D., and Schreiber, S.L. (2010). ML238: An Antimalarial Small Molecule of a Unique Structural Class. In Probe Reports from the NIH Molecular Libraries Program (Bethesda (MD)).

Xiao, J., Huang, Z., Chen, C.Z., Agoulnik, I.U., Southall, N., Hu, X., Jones, R.E., Ferrer, M., Zheng, W., Agoulnik, A.I., and Marugan, J.J. Identification and optimization of small-molecule agonists of the human relaxin hormone receptor RXFP1. *Nat Commun* 4, 1953 (2013).

Xie, X., Brogan, J.T., Schulte, M.L., Mi, D., Yu, H., Dawson, E.S., Li, M., McManus, O., Engers, J., Lewis, L.M., Thompson, A., Jones, C.K., Weaver, C.D., and Lindsley, C.W. (2010). Scaffold Hopping Affords a Highly Selective in vitro and in vivo T-Type Calcium Inhibitor Probe Free From IP Issues. In Probe Reports from the NIH Molecular Libraries Program (Bethesda (MD)).

Yu, H., Lin, Z., Mattmann, M.E., Zou, B., Terrenoire, C., Zhang, H., Wu, M., McManus, O.B., Kass, R.S., Lindsley, C.W., Hopkins, C.R., and Li, M. Dynamic subunit



stoichiometry confers a progressive continuum of pharmacological sensitivity by KCNQ potassium channels. *Proc Natl Acad Sci U S A* 110, 8732-8737 (2013).

Zhou, Y., Chun, A., Gogliotti, R.D., Dawson, E.S., Vinson, P.N., Niswender, C.M., Noetzel, M.J., Rook, J.M., Bridges, T.M., Daniels, J.S., Jones, C., Conn, P.J., Lindsley, C.W., and Stauffer, S.R. (2010). Pure Positive Allosteric Modulators (PAMs) of mGlu5 with Competitive MPEP-Site Interaction. In Probe Reports from the NIH Molecular Libraries Program (Bethesda (MD)).

Zhu, J., Choi, W.S., McCoy, J.G., Negri, A., Zhu, J., Naini, S., Li, J., Shen, M., Huang, W., Bougie, D., Rasmussen, M., Aster, R., Thomas, C.J., Filizola, M., Springer, T.A., and Collier, B.S. Structure-guided design of a high-affinity platelet integrin  $\alpha$ IIb $\beta$ 3 receptor antagonist that disrupts Mg(2)(+) binding to the MIDAS. *Sci Transl Med* 4, 125ra132 (2012).

Zou, B., Flaherty, D.P., Simpson, D.S., Maki, B.E., Miller, M.R., Shi, J., Wu, M., McManus, O.B., Golden, J.E., Aube, J., and Li, M. (2010). ML365: Development of Bis-Amides as Selective Inhibitors of the KCNK3/TASK1 Two Pore Potassium Channel. In Probe Reports from the NIH Molecular Libraries Program (Bethesda (MD)).

Zuhl, A.M., Mohr, J.T., Bachovchin, D.A., Niessen, S., Hsu, K.L., Berlin, J.M., Dochnahl, M., Lopez-Alberca, M.P., Fu, G.C., and Cravatt, B.F. Competitive activity-based protein profiling identifies aza-beta-lactams as a versatile chemotype for serine hydrolase inhibition. *J Am Chem Soc* 134, 5068-5071 (2012).
